# Supplementary material
Source: bioRxiv or medRxiv preprint supplement (https://medrxiv.org/highwire/filestream/83655/field_highwire_adjunct_files/0/2020.05.28.20115667-1.pdf)

# Supp Figure 1

**A**

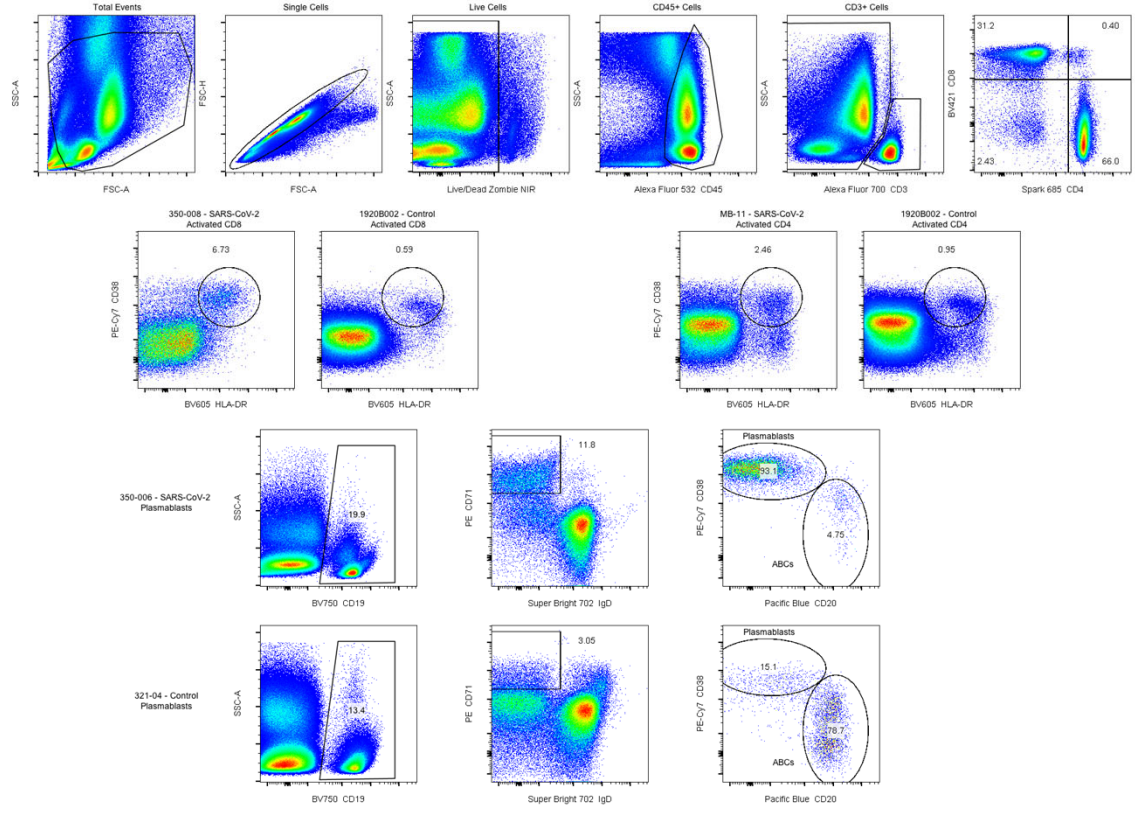

**B**

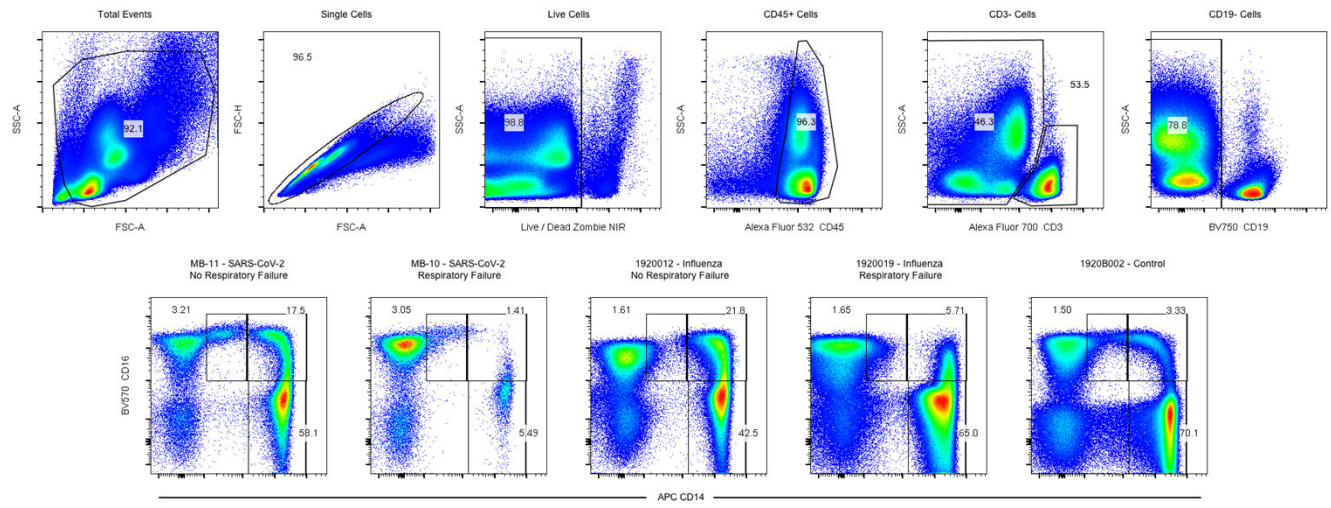

**C**

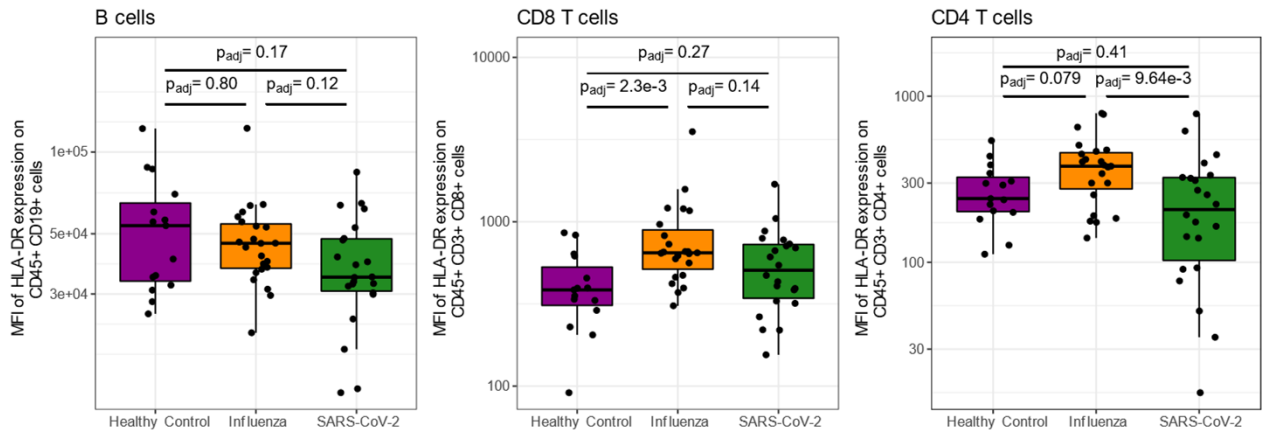

# Supp Figure 2

Cytokine Level Overview

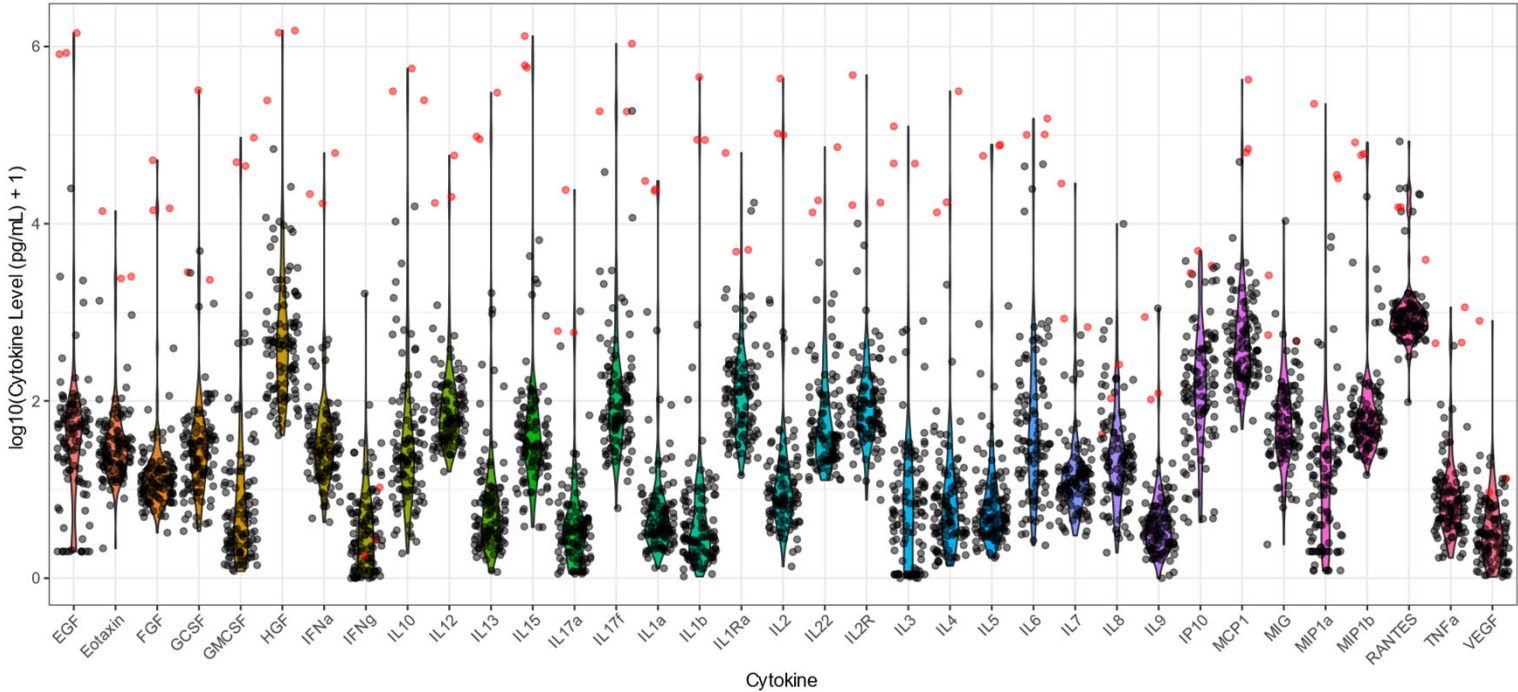

# Supp Figure 3

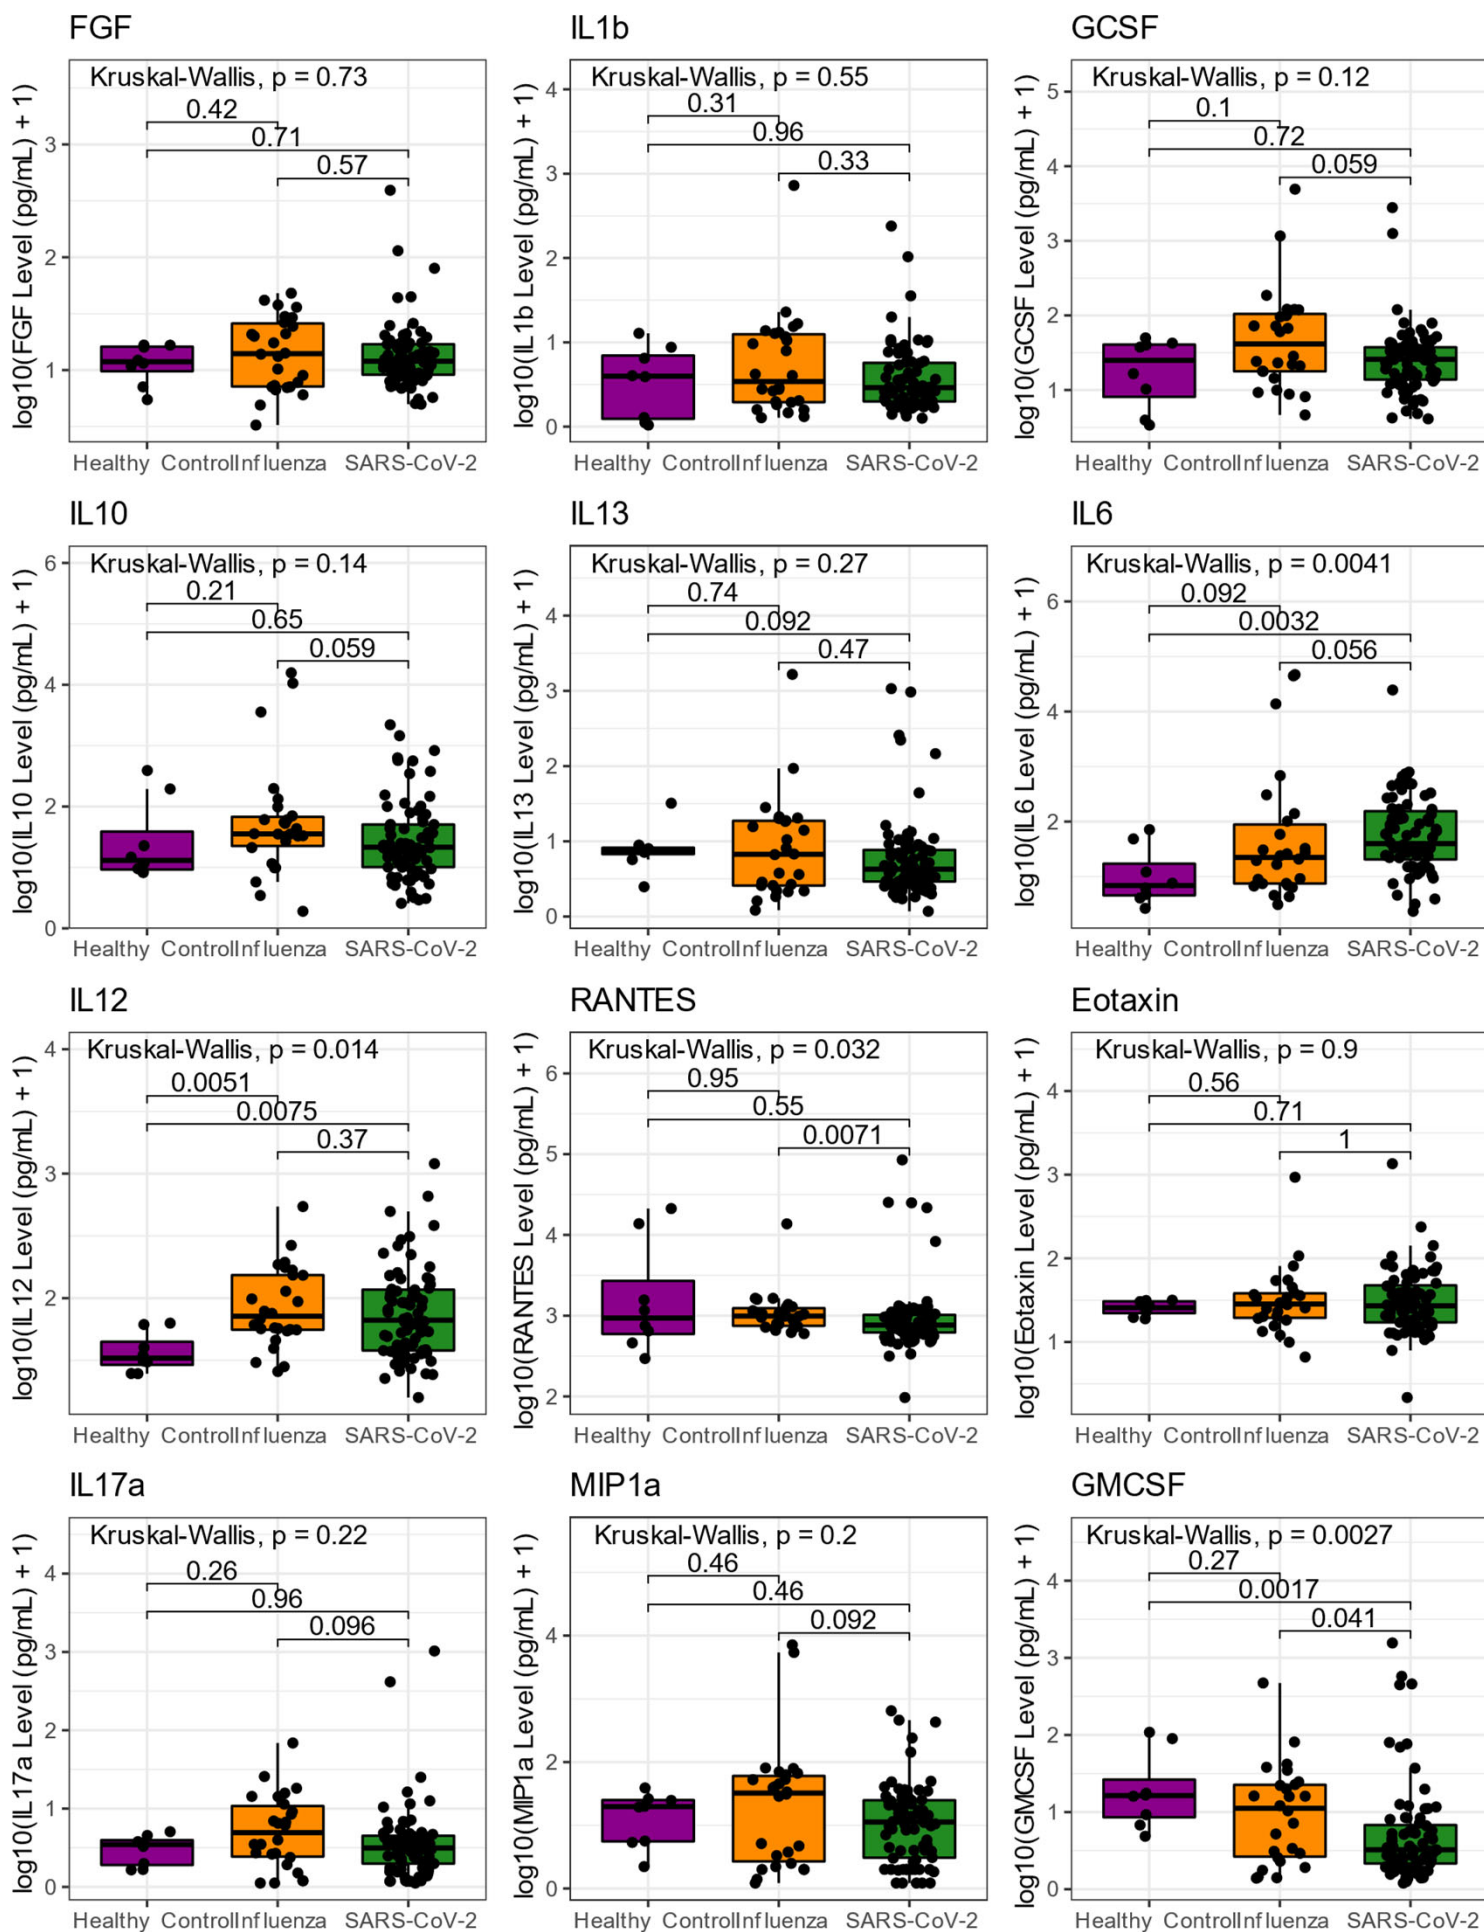

# Supp Figure 3 Cont'd.

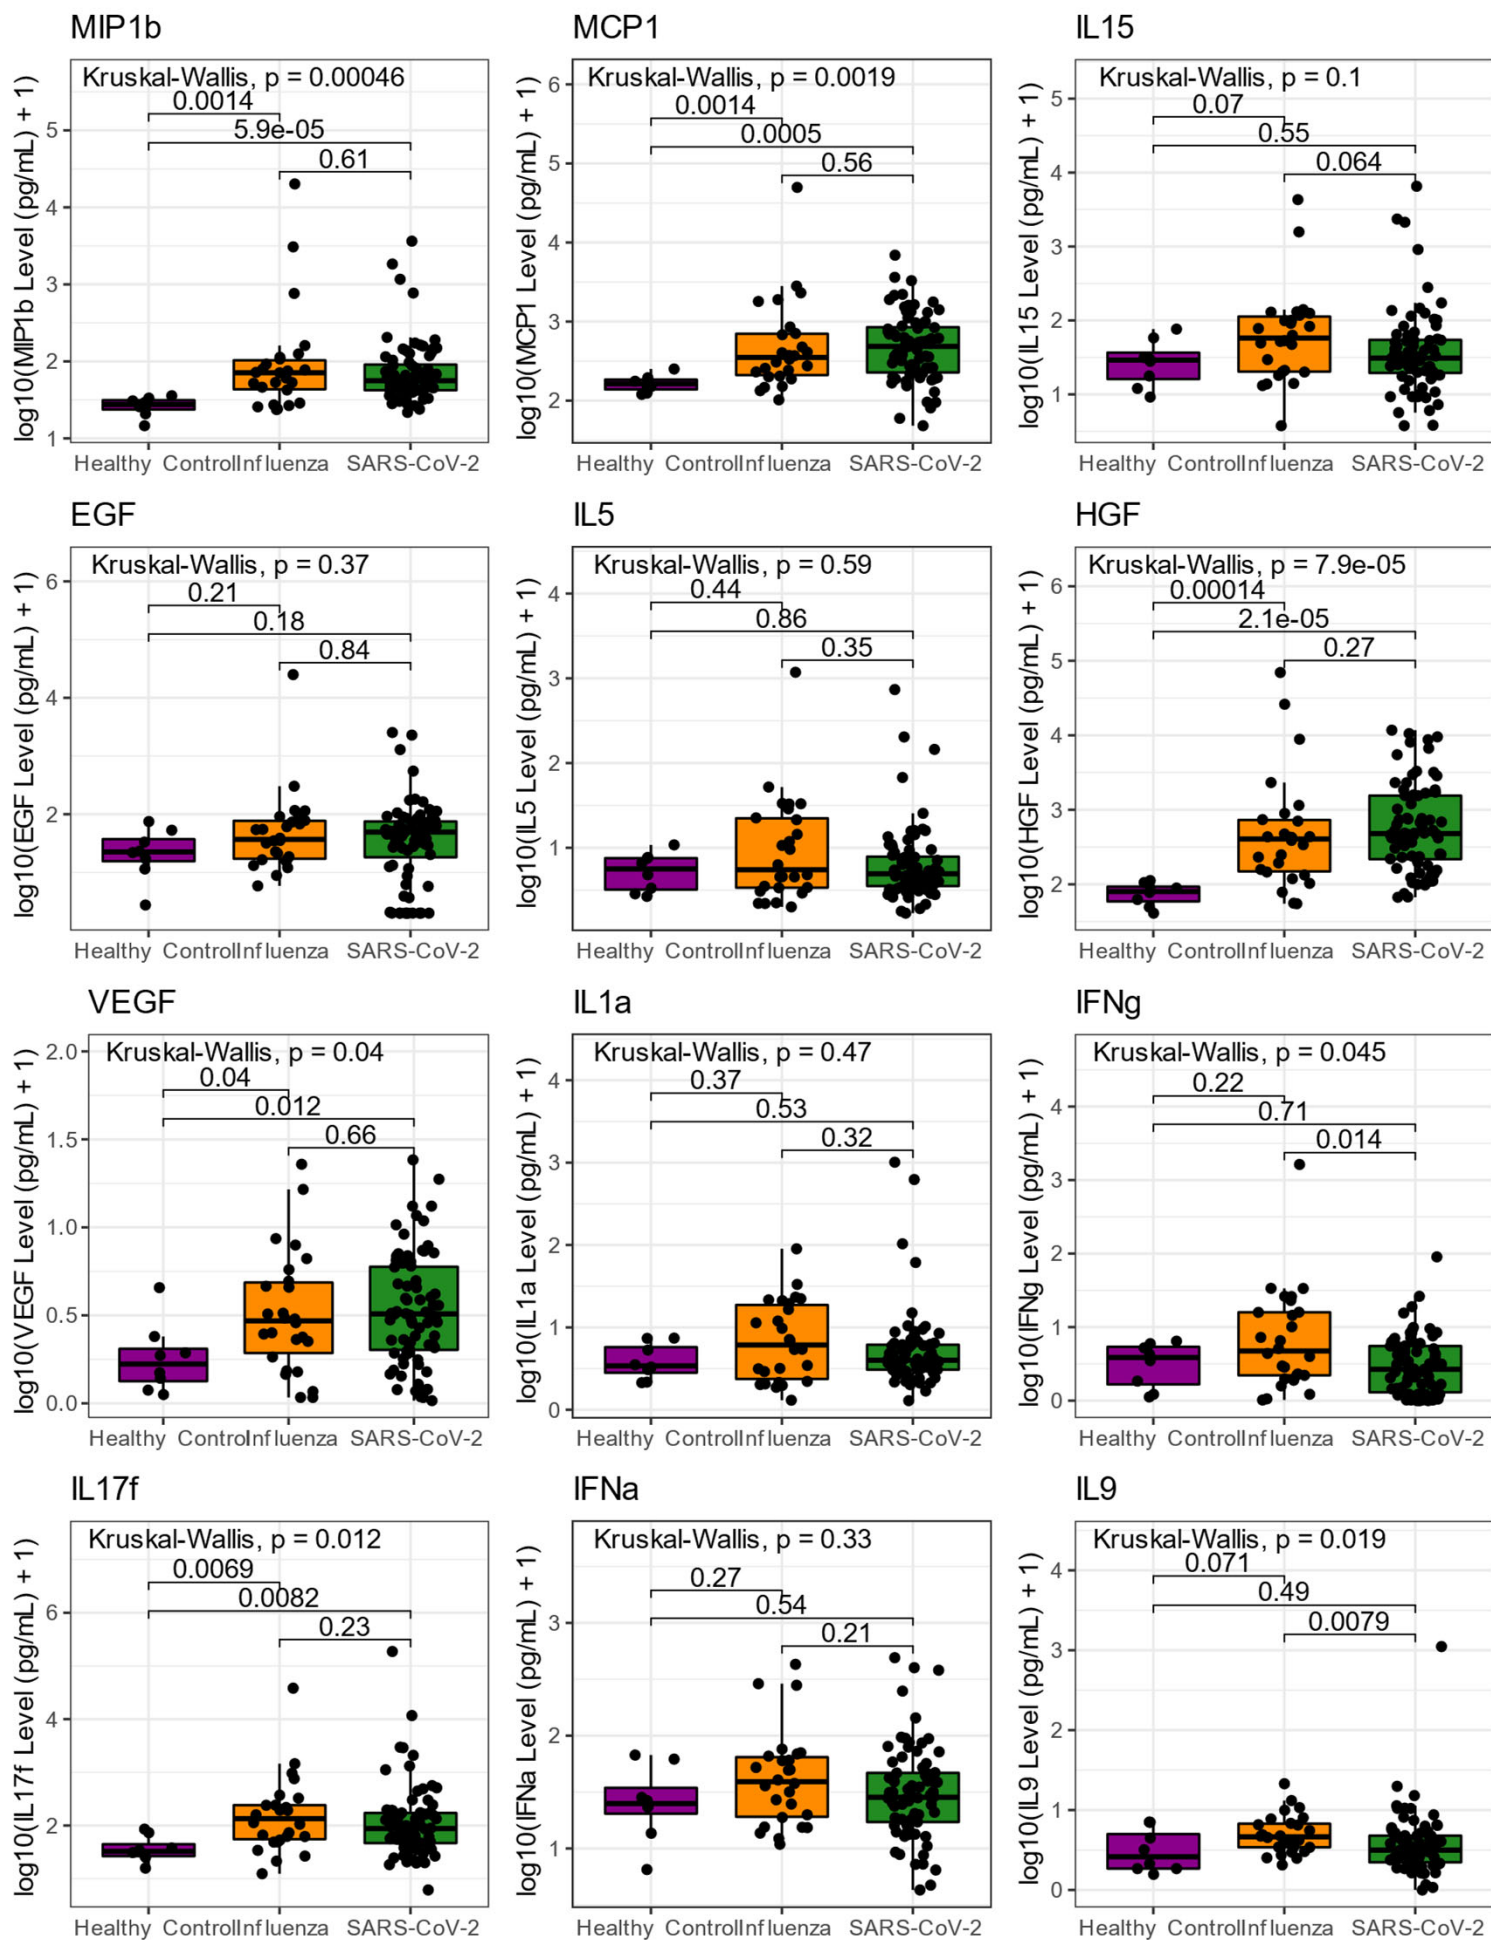

# Supp Figure 3 Cont'd.

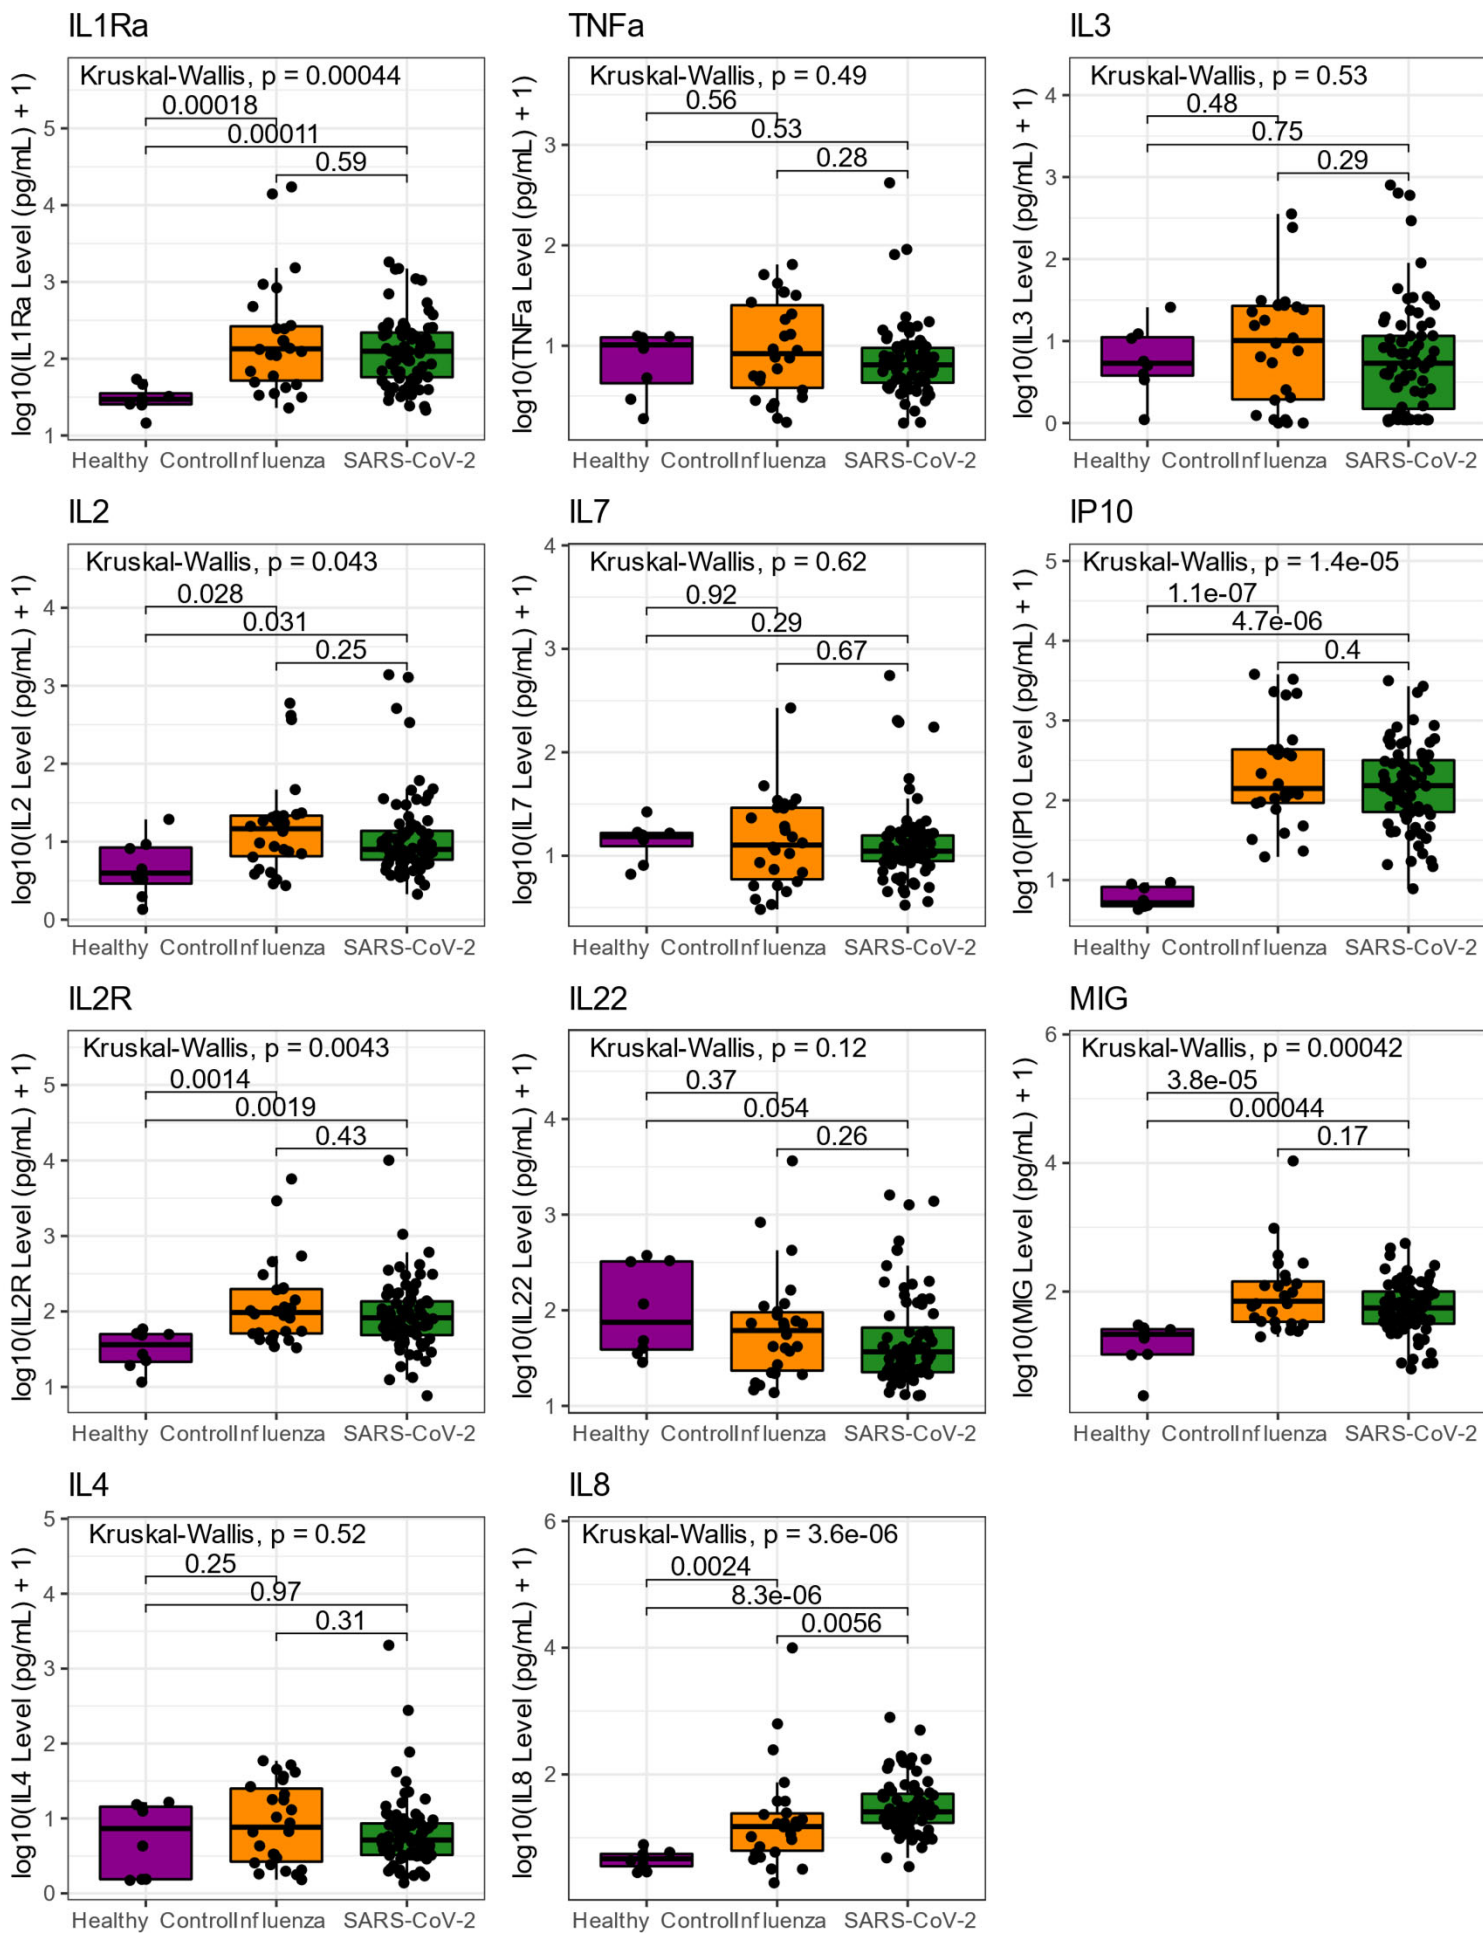



# Supp Figure 5

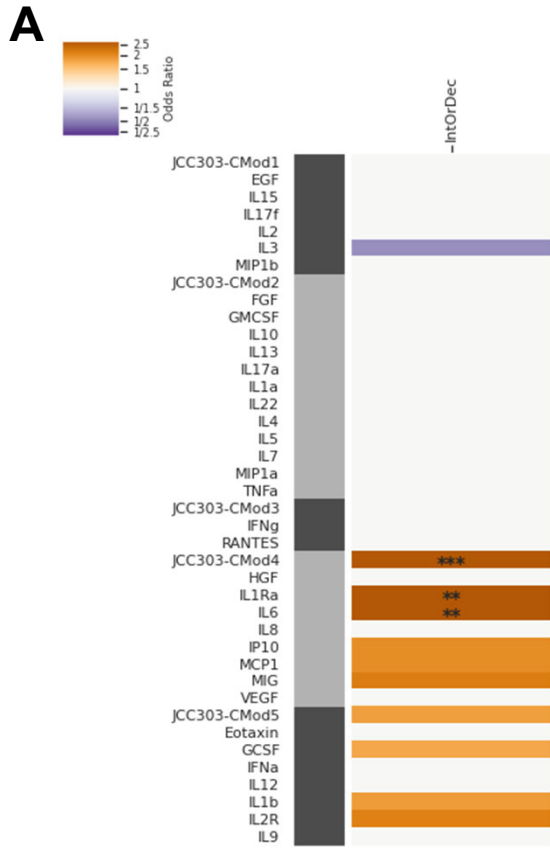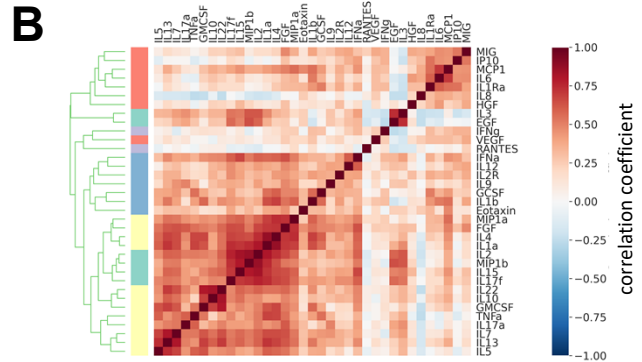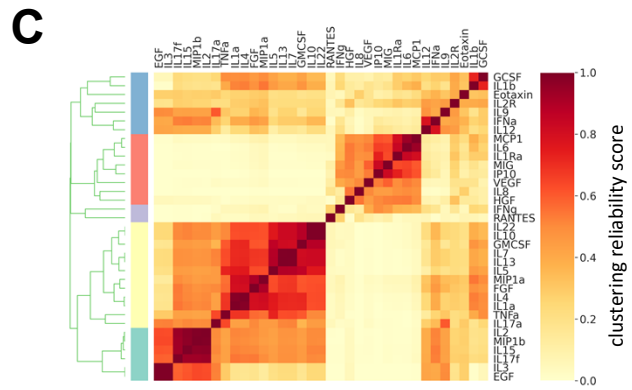

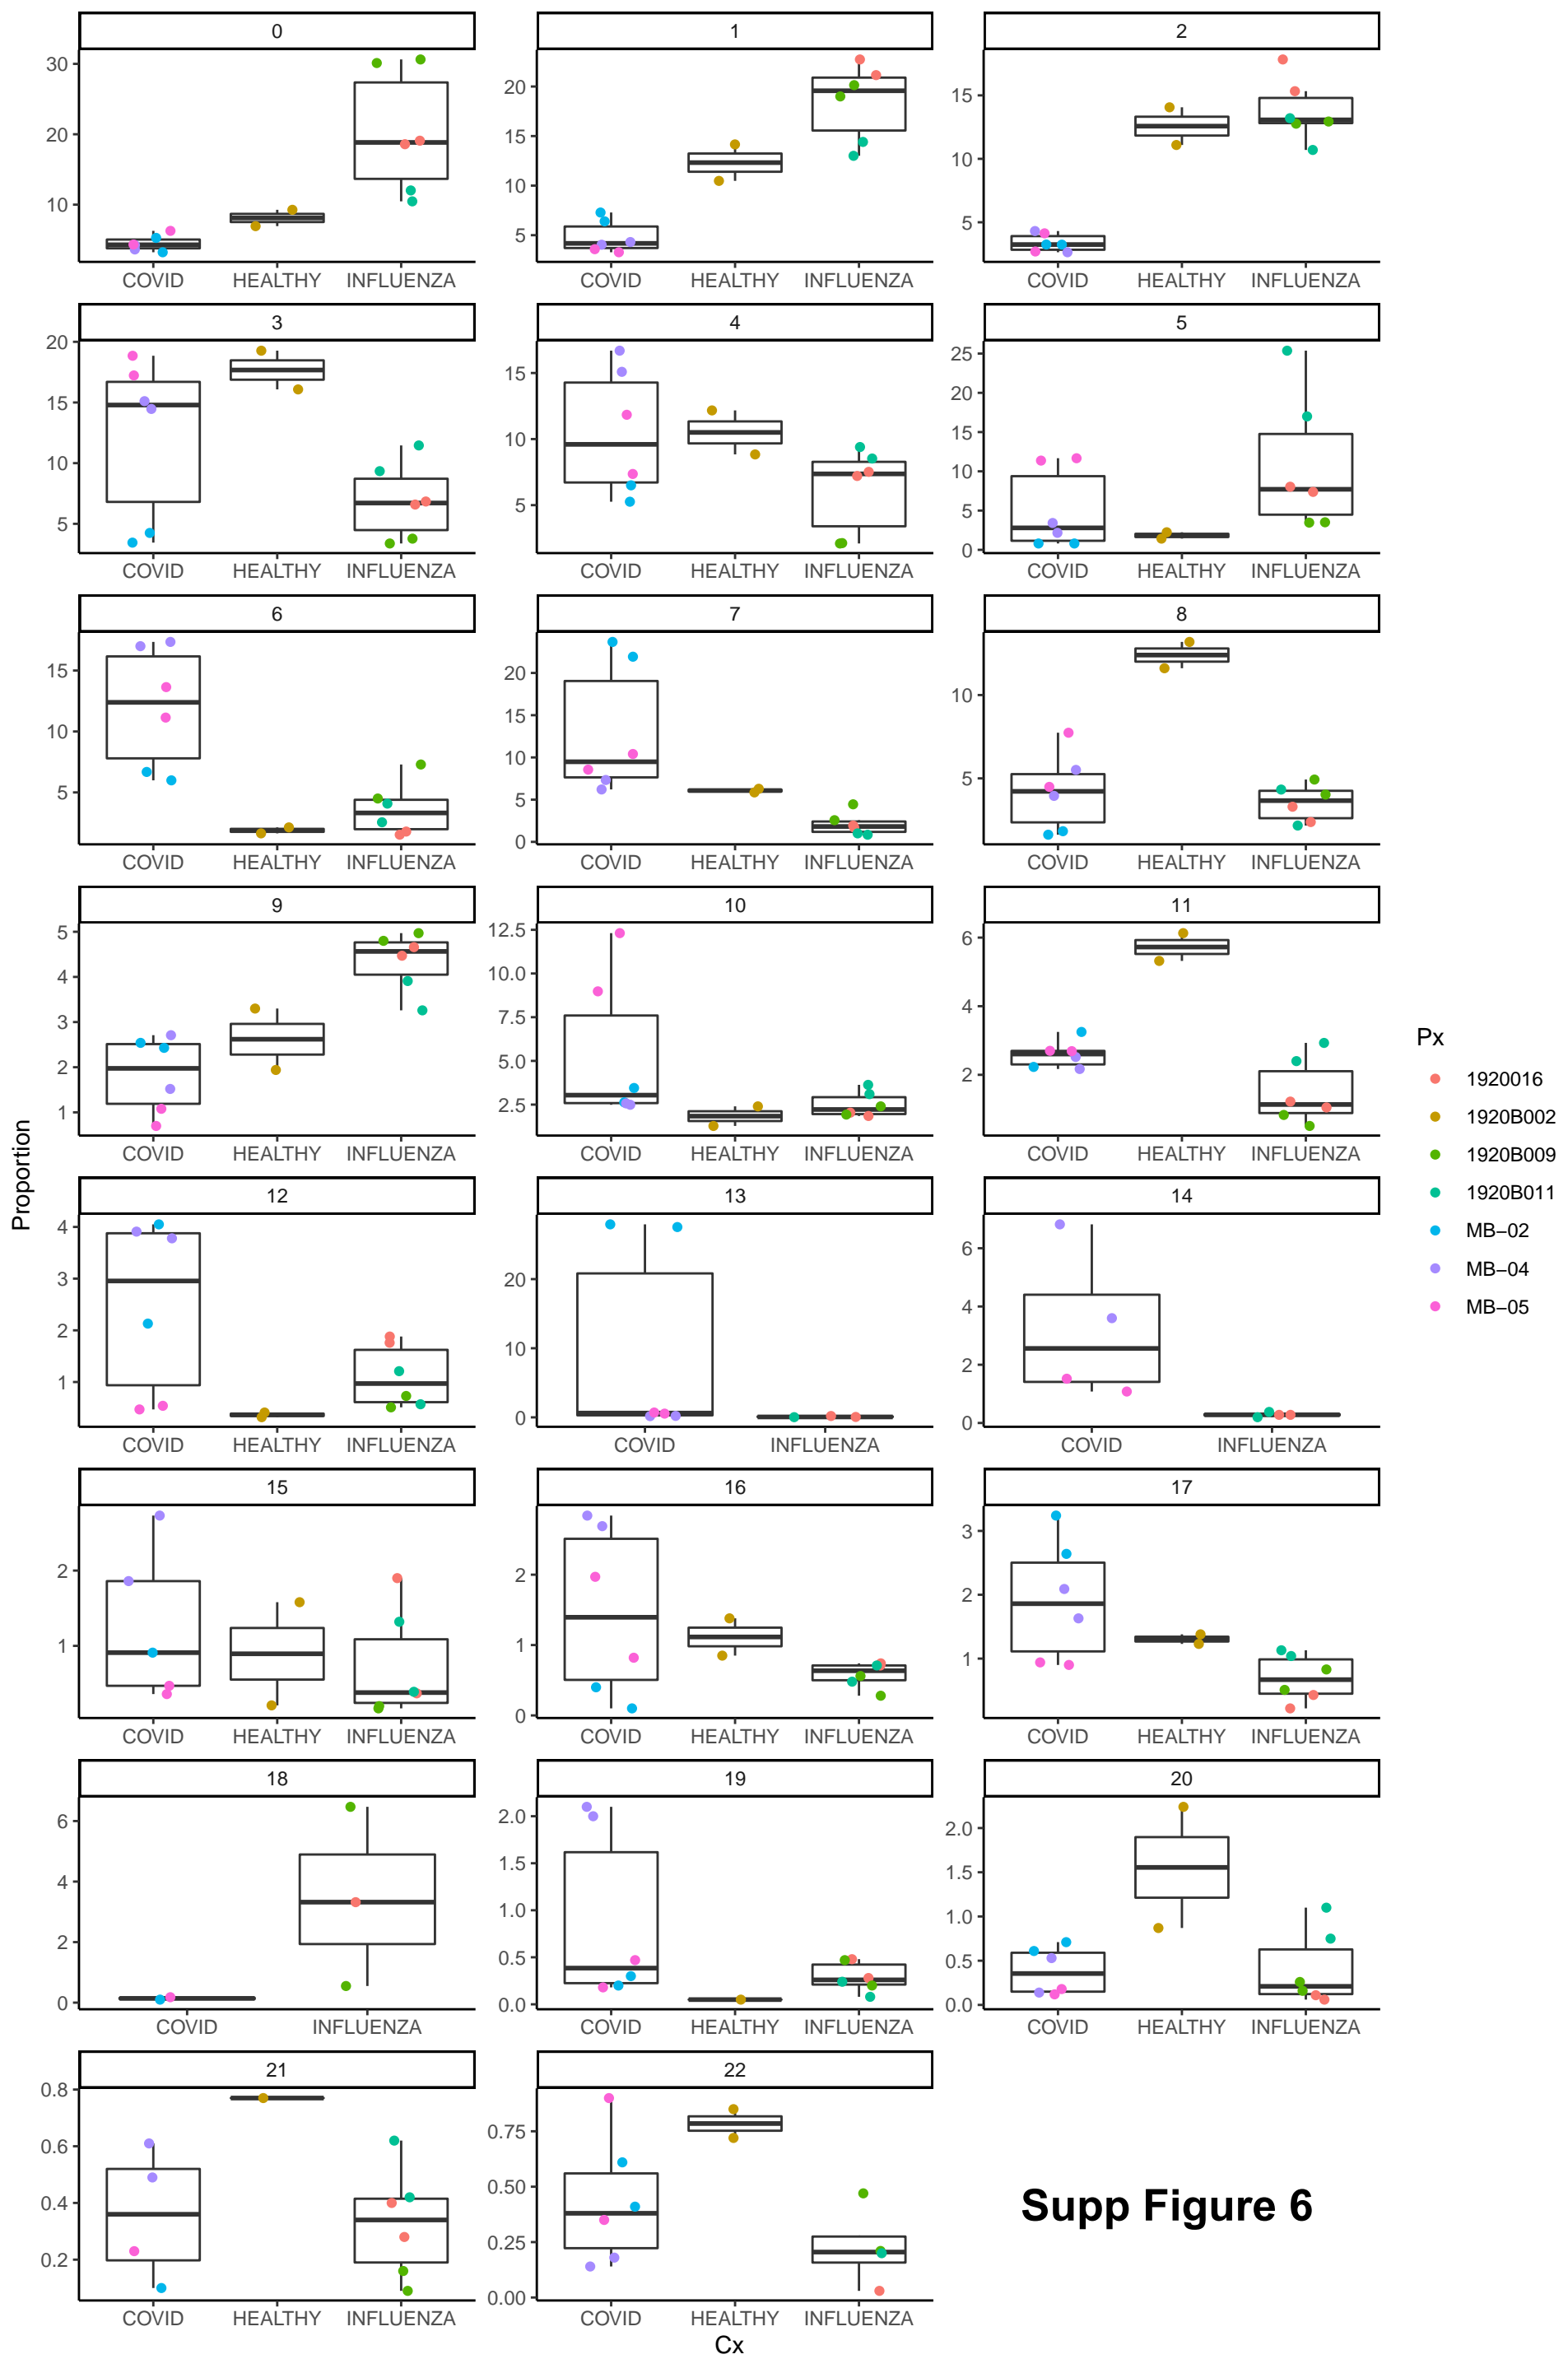



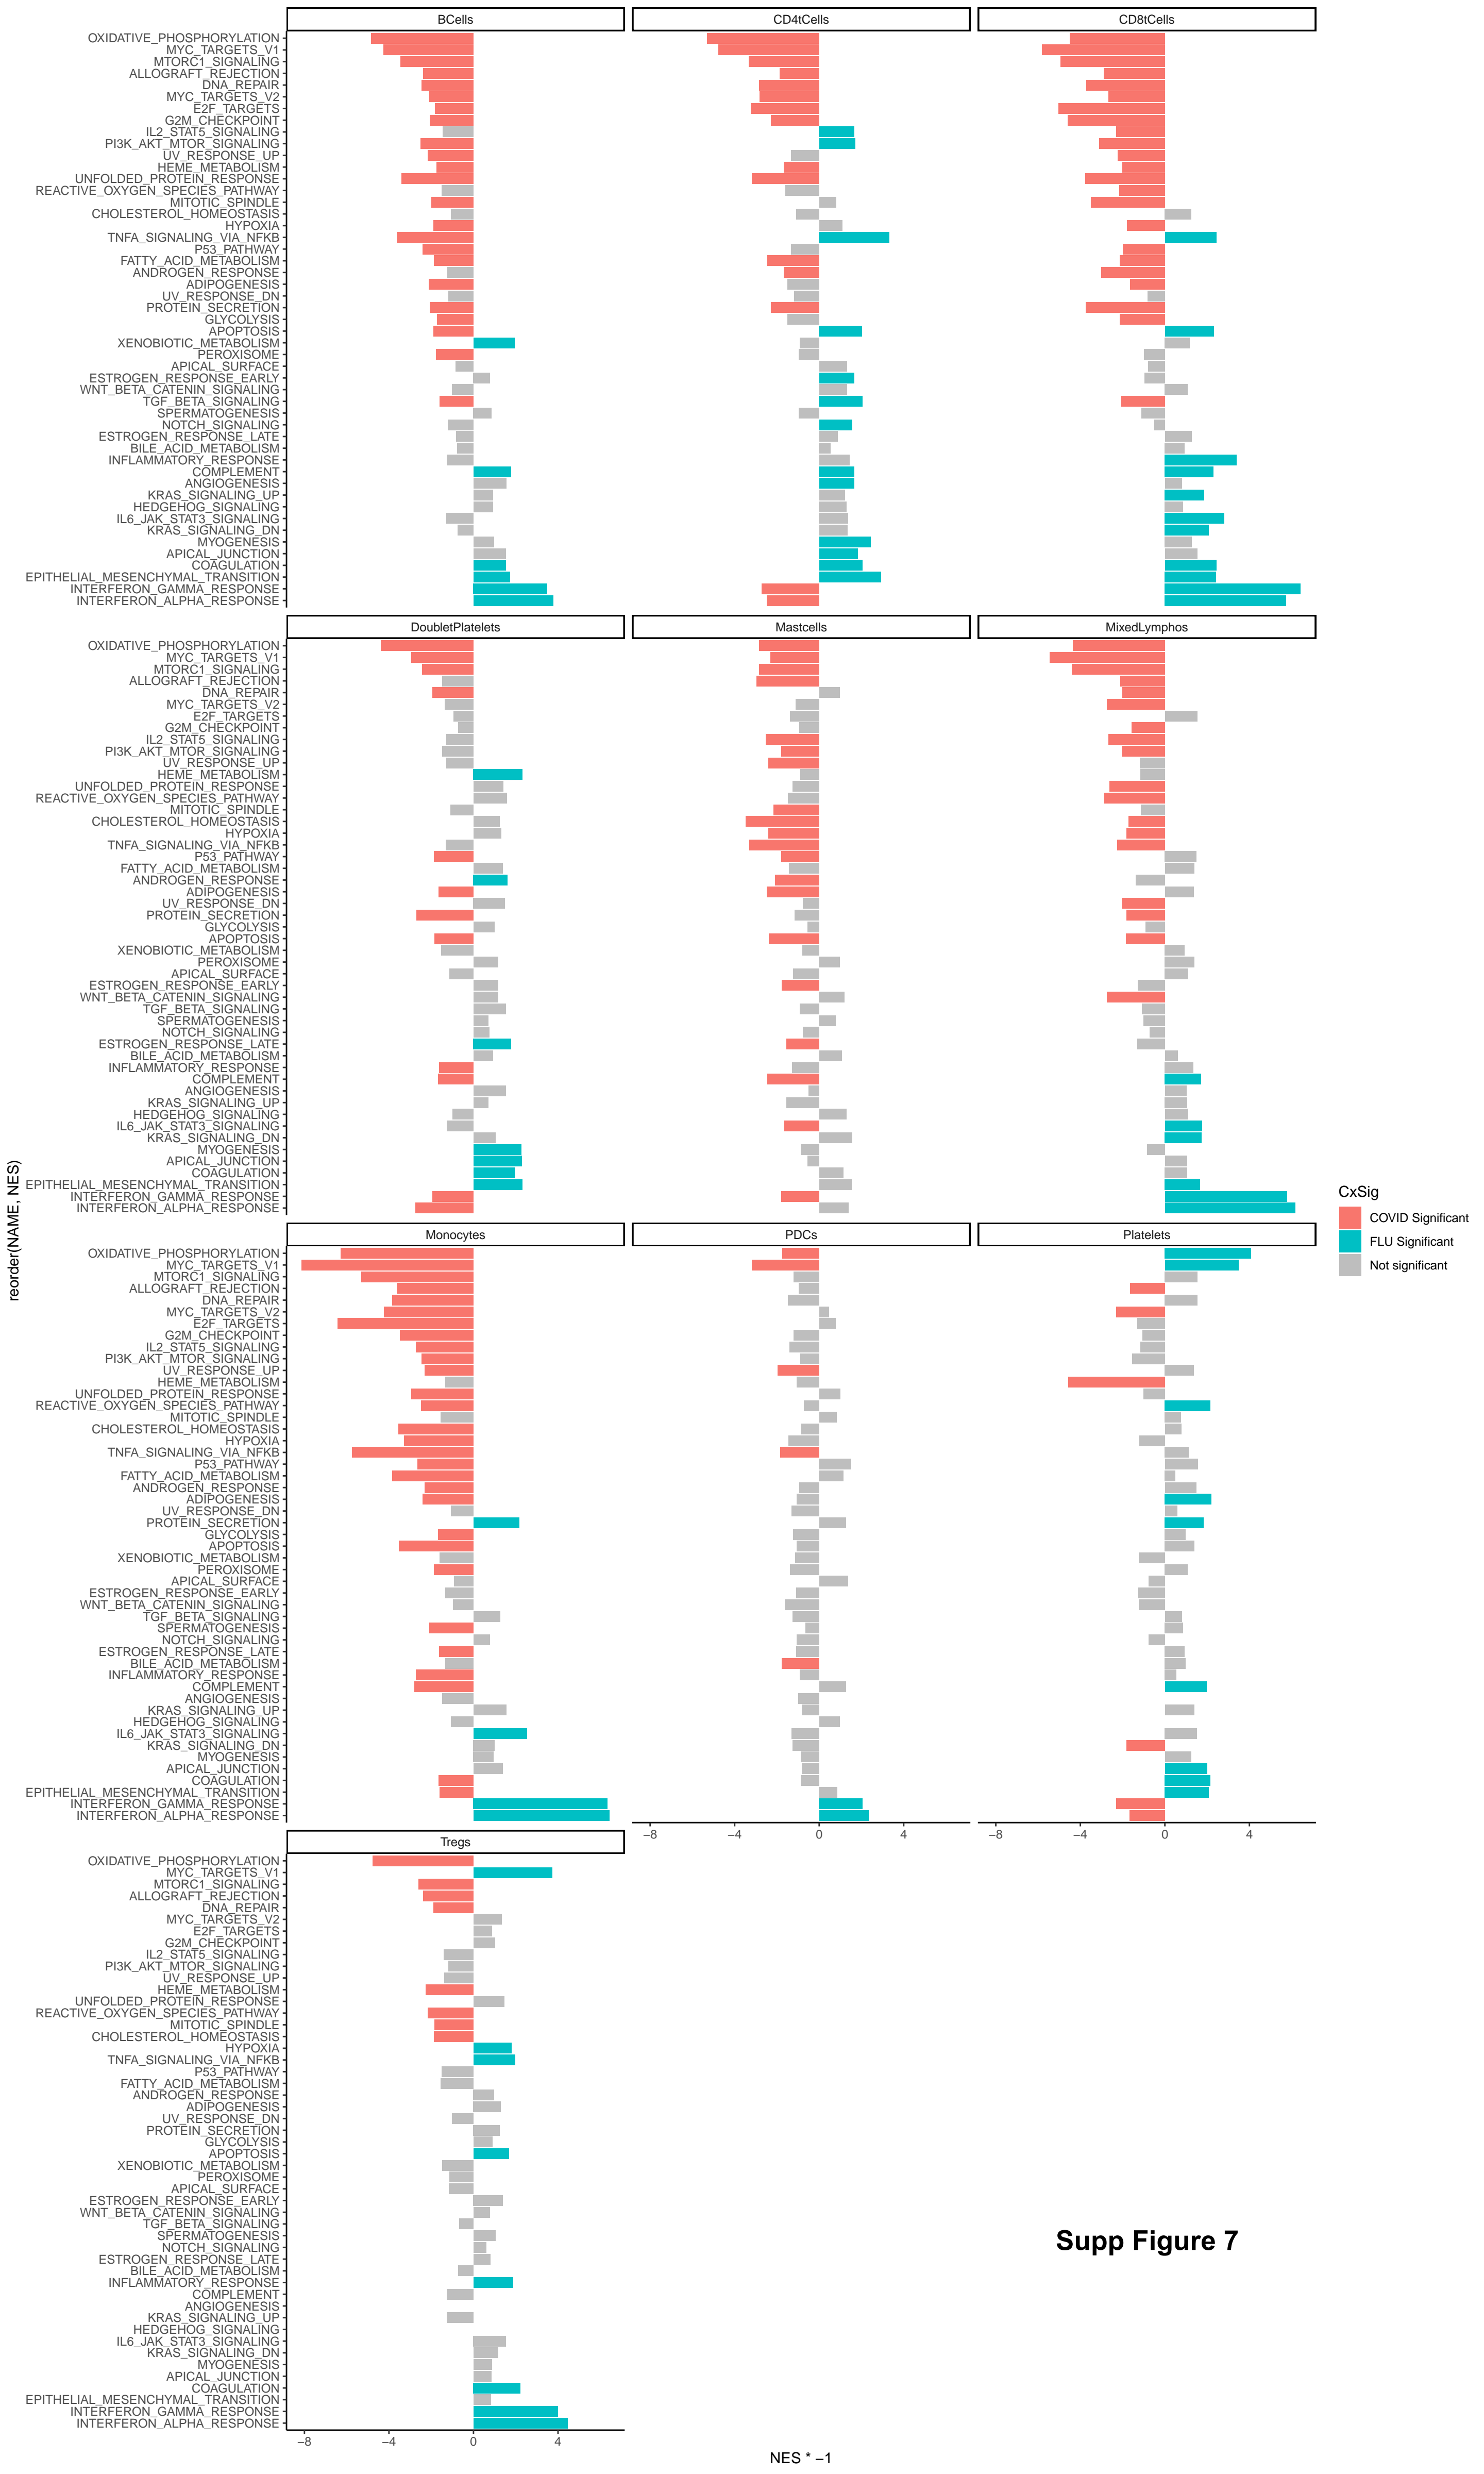

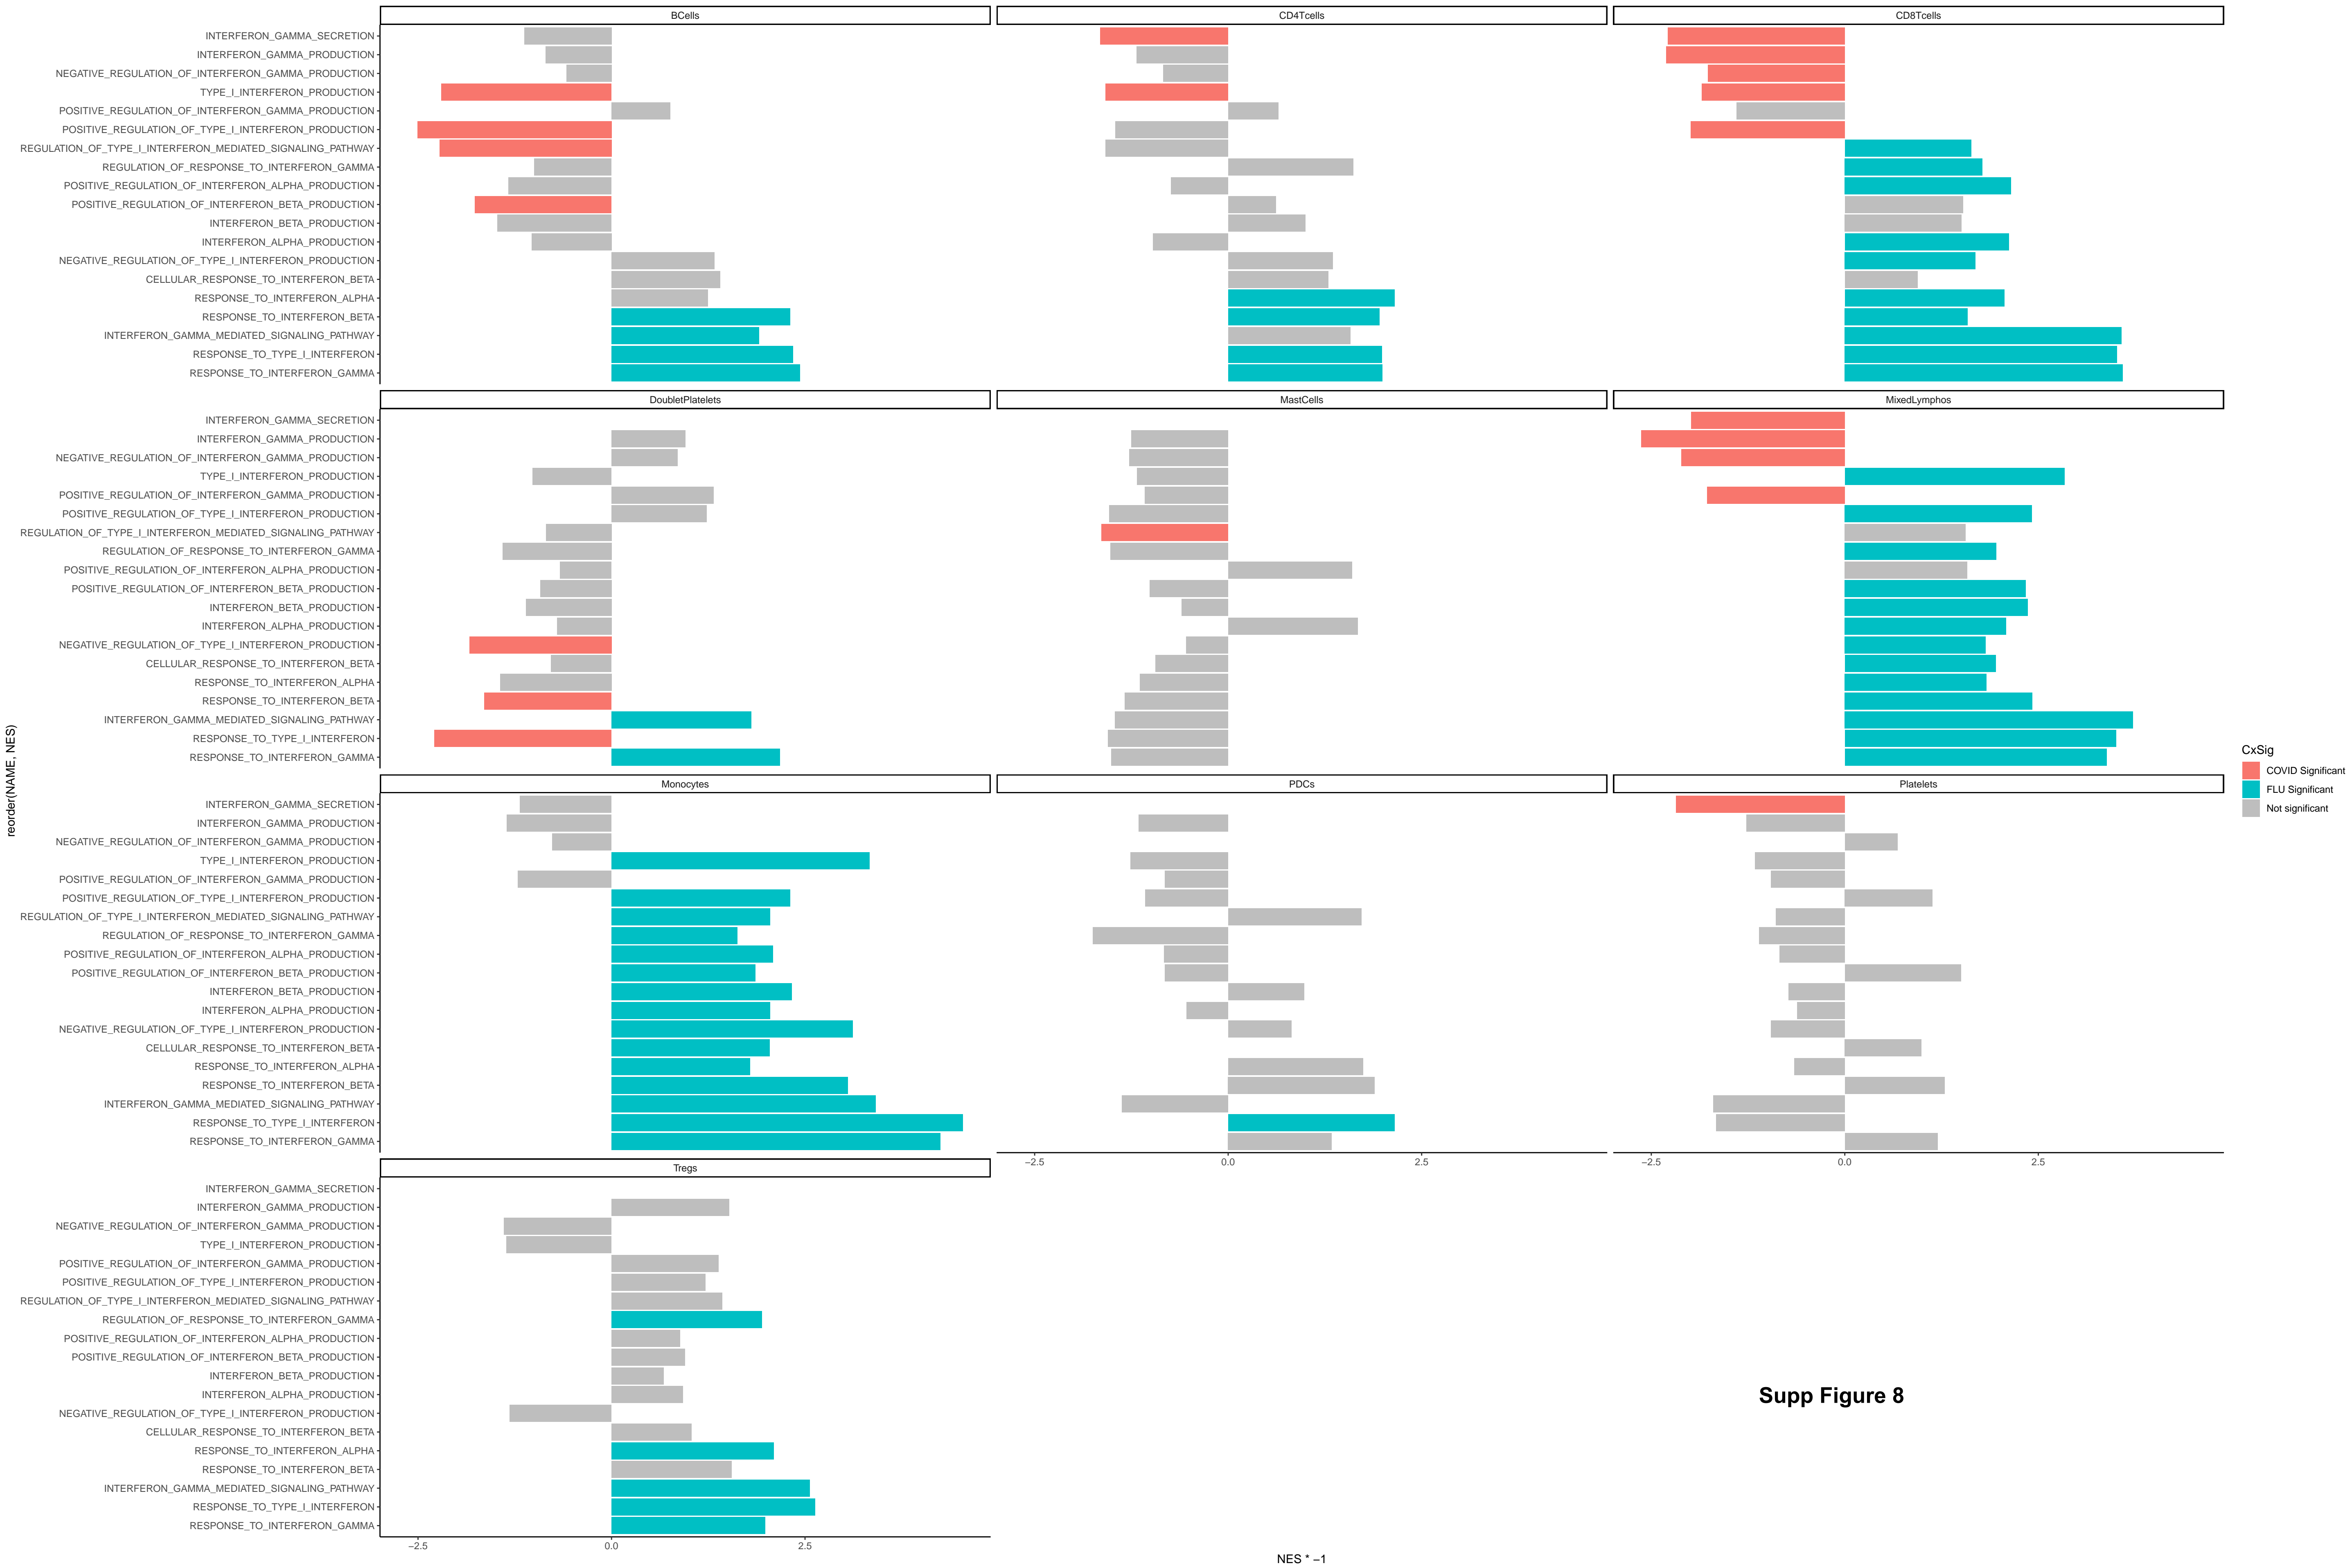

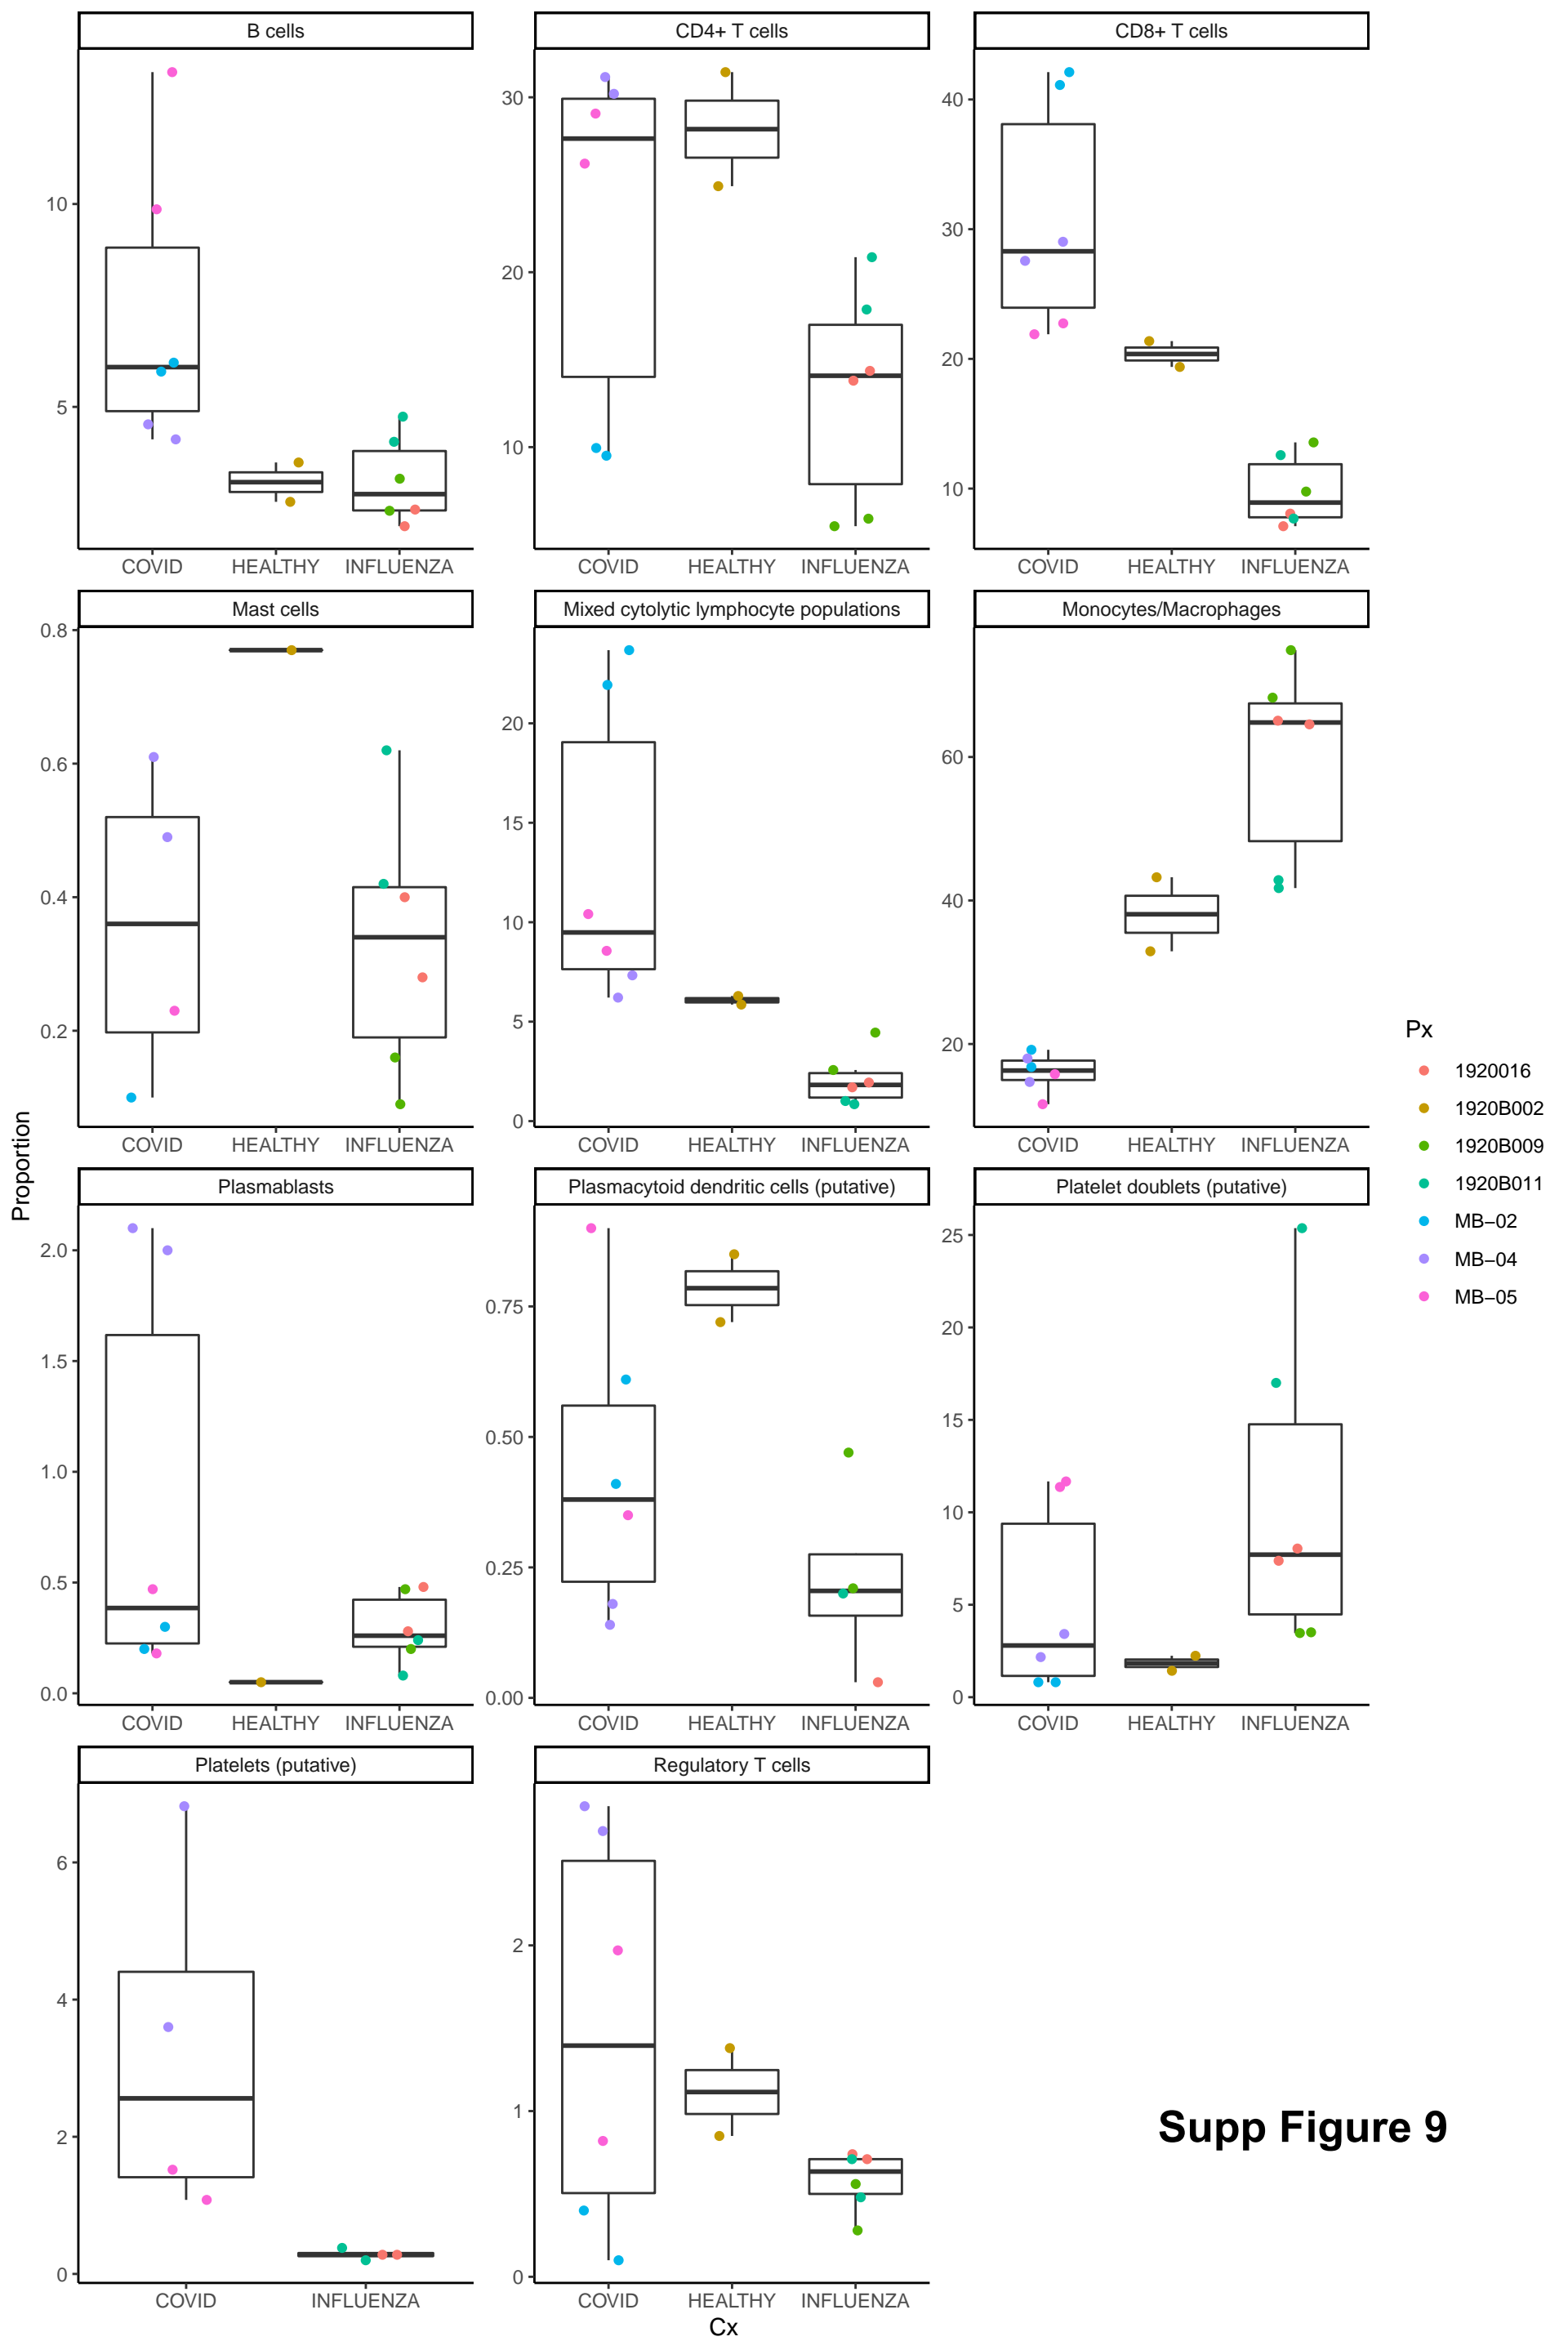

Supplement: Supplementary file [file 2020.05.28.20115667-1.pdf]
